# Supplementary material
Source: HighWire-hosted journal article supplement (https://erj.ersjournals.com/content/55/1/1901163)
Supplement: inline-supplementary-material-1 [file inline-supplementary-material-1.pdf]

# Characteristics and treatment regimens across ERS SHARP severe asthma registries

## - Supplementary materials -

Job J.M.H. van Bragt<sup>1</sup>, Ian M. Adcock<sup>2</sup>, Elisabeth H.D. Bel<sup>1</sup>, Gert-Jan Braunstahl<sup>3</sup>, Anneke Ten Brinke<sup>4</sup>, John Busby<sup>5</sup>, Giorgio W. Canonica<sup>6</sup>, Hui Cao<sup>7</sup>, Kian Fan Chung<sup>8</sup>, Zsuzsanna Csoma<sup>9</sup>, Barbro Dahlen<sup>10</sup>, Elizabeth Davin<sup>11</sup>, Susanne Hansen<sup>12</sup>, Enrico Heffler<sup>6</sup>, Ildiko Horvath<sup>9</sup>, Stephanie Korn<sup>13</sup>, Maxim Kots<sup>14</sup>, Piotr Kuna<sup>15</sup>, Namhee Kwon<sup>16</sup>, Renaud Louis<sup>17</sup>, Vicente Plaza<sup>18</sup>, Celeste Porsbjerg<sup>19</sup>, David Ramos-Barbon<sup>18</sup>, Levi B. Richards<sup>1</sup>, Sabina Skrgat<sup>20</sup>, Jacob K. Sont<sup>21</sup>, Susanne J.H. Vijverberg<sup>1</sup>, Els J. Weersink<sup>1</sup>, Valentyna Yasinska<sup>10</sup>, Scott S. Wagers<sup>22</sup>, Ratko Djukanovic<sup>23</sup>, Anke H. Maitland-van der Zee<sup>1</sup>, **on behalf of the SHARP CRC.**

<sup>1</sup>*Amsterdam UMC, University of Amsterdam, Department of Respiratory Medicine, Amsterdam, The Netherlands*

<sup>2</sup>*National Heart and Lung Institute, Imperial College London, London, United Kingdom*

<sup>3</sup>*Franciscus Gasthuis & Vlietland, Rotterdam, The Netherlands*

<sup>4</sup>*Medical Centre Leeuwarden, Leeuwarden, The Netherlands*

<sup>5</sup>*Centre for Public Health, School of Medicine, Dentistry and Biomedical Sciences, Queen's University Belfast, Belfast, United Kingdom*

<sup>6</sup>*Personalized Medicine Clinic, Asthma and Allergy, Humanitas Clinical and Research Center, Humanitas University, Rozzano and SANI-Severe Asthma Network Italy, Milan, Italy*

- <sup>7</sup>Novartis Pharmaceuticals Corporation, East Hanover, NJ, USA
- <sup>8</sup>Airway Disease, National Heart and Lung Institute, Imperial College London, London, United Kingdom
- <sup>9</sup>National Koranyi Institute of Pulmonology, Budapest, Hungary
- <sup>10</sup>Division of Respiratory Medicine and Allergy, Department of Medicine, Karolinska University Hospital, Huddinge, Sweden
- <sup>11</sup>European Lung Foundation, Sheffield, United Kingdom
- <sup>12</sup>Center for Clinical Research and Disease Prevention, Bispebjerg and Frederiksberg Hospital, The Capital Region, Copenhagen, Denmark
- <sup>13</sup>Universitätsmedizin Mainz, Mainz, Germany
- <sup>14</sup>Chiesi Farmaceutici, Global Clinical Development, Parma, Italy
- <sup>15</sup>Department of Internal Medicine, Asthma and Allergy, Medical University of Lodz, Lodz, Poland
- <sup>16</sup>Respiratory Medical Franchise, GSK, Brentford, United Kingdom
- <sup>17</sup>Department of Pulmonary Medicine, Centre Hospitalier Universitaire (CHU), GIGA<sup>3</sup> Research Group, Liege University, Liege, Belgium
- <sup>18</sup>Respiratory Medicine Department & Biomedical Research Institute, Hospital de la Santa Creu i Sant Pau, Universitat Autònoma de Barcelona, Barcelona, Spain
- <sup>19</sup>Respiratory Research Unit, Department of Respiratory Medicine, Bispebjerg University Hospital, Copenhagen, Denmark
- <sup>20</sup>University Clinic of Respiratory and Allergic Diseases, Golnik, Slovenia
- <sup>21</sup>Department of Biomedical Data Sciences, section Medical Decision Making, Leiden University Medical Center, Leiden, The Netherlands
- <sup>22</sup>BioSciConsulting, Maasmechelen, Belgium
- <sup>23</sup>NIHR Southampton Respiratory Biomedical Research Unit, Faculty of Medicine, University of Southampton, Southampton, United Kingdom

**Supplementary table S1.** Baseline characteristics of patients enrolled in the national SHARP registries.

| Parameter                |                   | NL    | Belgium | United Kingdom | Spain | Hungary | Poland | Sweden | Germany | Italy | Slovenia | Denmark |
|--------------------------|-------------------|-------|---------|----------------|-------|---------|--------|--------|---------|-------|----------|---------|
| <i>Demographic</i>       |                   |       |         |                |       |         |        |        |         |       |          |         |
| Age                      | n                 | 237   | 629     | 765            | 410   | 130     | 193    | 27     | 209     | 434   | 140      | 59      |
|                          | years             | 52,8  | 56,9    | 47,6           | 56,4  | 58,3    | 48,4   | 50     | 44,4    | 54,1  | 53,5     | 51,9    |
|                          | SD                | 14,2  | 14,7    | 14,5           | 14,8  | 12,9    | 14,6   | 8,6    | 20,4    | 13,7  | 12,8     | 16,1    |
| Male                     | n                 | 112   | 265     | 285            | 133   | 42      | 76     | 14     | 98      | 183   | 42       | 28      |
|                          | %                 | 47,3  | 42,1    | 37,3           | 32,4  | 32,3    | 39,4   | 51,9   | 46,9    | 41,9  | 30       | 47,5    |
| Smoking status available | n                 | 235   | 629     | 734            | 410   | 130     | 193    | 27     | 209     | 437   | 140      | 50      |
| Current smoker           | n                 | 2     | 60      | 30             | 29    | 8       | 0      | 0      | 5       | 12    | 1        | 2       |
|                          | %                 | 0,9   | 9,5     | 4,1            | 7,1   | 6,2     | 0      | 0      | 2,4     | 2,7   | 0,7      | 4       |
| Never smoker             | n                 | 136   | 368     | 526            | 281   | 108     | 171    | 16     | 125     | 352   | 92       | 24      |
|                          | %                 | 57,9  | 58,5    | 71,7           | 68,5  | 83,1    | 88,6   | 59,3   | 59,8    | 80,5  | 65,7     | 48      |
| Ex-smoker                | n                 | 97    | 201     | 178            | 100   | 14      | 22     | 11     | 79      | 73    | 47       | 19      |
|                          | %                 | 41,3  | 32      | 24,3           | 24,4  | 10,8    | 11,4   | 40,7   | 37,9    | 16,7  | 33,5     | 38      |
| Pack-years               | n                 | 94    | 194     | 179            | 25    | 22      | 22     | 11     | 85      | 85    | 48       | 16      |
|                          | years, median     | 10    | 15      | 15             | 19    | <5 PY   | NA     | 5      | 8       | 9     | 10       | 8,5     |
|                          | Q1                | 4     | 6       | 5              | 10    | <5 PY   | NA     | 4      | 2       | 4     | 3        | 2,2     |
|                          | Q3                | 19    | 27      | 20             | 23    | <5 PY   | NA     | 9      | 15      | 15    | 20       | 15      |
| <i>Clinical</i>          |                   |       |         |                |       |         |        |        |         |       |          |         |
| BMI                      | n                 | 236   | 629     | 740            | 410   | 130     | 193    | 27     | 207     | 295   | 138      | 58      |
|                          | kg/m <sup>2</sup> | 28,3  | 27,7    | 30,6           | 28,2  | 26,9    | 28,1   | 27,7   | 27,4    | 26,2  | 27,1     | 27,1    |
|                          | SD                | 5,4   | 12,6    | 7,4            | 6     | 5,4     | 4,48   | 5,3    | 10,8    | 5     | 5,8      | 5,4     |
| Pre-BD FEV <sub>1</sub>  | n                 | 234   | 607     | 669            | 87    | 130     | 193    | 27     | 182     | 285   | 140      | 50      |
|                          | %pred             | 76,9  | 67,9    | 67,8           | 68,1  | 56      | 63,2   | 66     | 70,3    | 71,4  | 69,6     | 72,0    |
|                          | SD                | 22,2  | 21,6    | 22,8           | 36,1  | 16,8    | 23,5   | 19,9   | 23      | 20,2  | 19,8     | 19,4    |
| Pre-BD FVC               | n                 | 234   | 607     | 647            | NA    | 130     | NA     | 27     | 182     | 280   | 137      | 49      |
|                          | %pred             | 98,3  | 88,2    | 85,3           | NA    | 76,6    | NA     | 86,8   | 84,9    | 88,2  | 95       | 78,2    |
|                          | SD                | 20,5  | 20,2    | 19,8           | NA    | 18,5    | NA     | 19,6   | 19,7    | 21,1  | 15,6     | 18,3    |
| Post-BD FEV <sub>1</sub> | n                 | 152   | 629     | 374            | NA    | 130     | NA     | 27     | 65      | 193   | NA       | NA      |
|                          | %pred             | 81    | 75      | 73,4           | NA    | 63      | NA     | 73,2   | 70,2    | 77,8  | NA       | NA      |
|                          | SD                | 22,3  | 57,1    | 22,5           | NA    | 17,5    | NA     | 19     | 33,2    | 28,4  | NA       | NA      |
| Post-BD FVC              | n                 | 152   | NA      | 359            | NA    | 130     | NA     | 27     | NA      | NA    | NA       | NA      |
|                          | %pred             | 102,4 | NA      | 90,7           | NA    | 82,9    | NA     | 91,7   | NA      | NA    | NA       | NA      |
|                          | SD                | 18    | NA      | 20,1           | NA    | 19,2    | NA     | 14,5   | NA      | NA    | NA       | NA      |
| PC20                     | n                 | NA    | 55      | 12             | NA    | NA      | NA     | NA     | NA      | NA    | NA       | NA      |
|                          | mg/ml, median     | NA    | 0,93    | 14,8           | NA    | NA      | NA     | NA     | NA      | NA    | NA       | NA      |
|                          | Q1                | NA    | 0,26    | 4              | NA    | NA      | NA     | NA     | NA      | NA    | NA       | NA      |
|                          | Q3                | NA    | 7,66    | 16             | NA    | NA      | NA     | NA     | NA      | NA    | NA       | NA      |
| KCO                      | n                 | 97    | 482     | 491            | NA    | 16      | NA     | 27     | 76      | NA    | 49       | NA      |
|                          | %pred (SD)        | 98,2  | 97,3    | 97,3           | NA    | 85,8    | NA     | 79,3   | 76,7    | NA    | 83,4     | NA      |

|                                              |                                   |       |       |       |       |       |       |       |            |       |       |       |
|----------------------------------------------|-----------------------------------|-------|-------|-------|-------|-------|-------|-------|------------|-------|-------|-------|
|                                              | SD                                | 18,8  | 20,9  | 38,9  | NA    | 4,1   | NA    | 15,9  | 21         | NA    | 20,5  | NA    |
| Medical history available                    | n                                 | 204   | 629   | 644   | 410   | 130   | 193   | 27    | 170        | 301   | 140   | 33    |
| Adult onset                                  | n                                 | 129   | 200   | 385   | NA    | 89    | 68    | 24    | 61         | 105   | 110   | 26    |
|                                              | %                                 | 63,2  | 31,8  | 59,8  | NA    | 68,5  | 35,2  | 88,9  | 39,4       | 24    | 78    | 76,0  |
| Asthma hospitalization during past 12 months | n                                 | NA    | 229   | 291   | 52    | 36    | 78    | 1     | 55         | 53    | 61    | 16    |
|                                              | %                                 | NA    | 36    | 39,5  | 12,7  | 28    | 40,5  | 3,7   | 32,4       | 17,6  | 47,2  | 40,0  |
| Ever near fatal exacerbations                | n                                 | 31    | 76    | NA    | 0     | 11    | 52    | 2     | 16         | 10    | 21    | 0     |
|                                              | %                                 | 13,1  | 12    | NA    | 0     | 8     | 27    | 7,4   | 9,4        | 3,3   | 16,1  | 0     |
| ACQ                                          | n                                 | 143   | 439   | 687   | NA    | NA    | 193   | 17    | 190        | 192   | NA    | 33    |
|                                              | mean score                        | 2,1   | 2,5   | 3     | NA    | NA    | 3,3   | 1,8   | 2,6        | 2,9   | NA    | 2,4   |
|                                              | SD                                | 1,2   | 1,3   | 1,3   | NA    | NA    | 0,9   | 1     | 1,5        | 1,5   | NA    | 1,4   |
| ACT                                          | n                                 | NA    | 455   | NA    | 327   | 130   | 28    | 10    | 196        | 266   | 136   | NA    |
|                                              | mean score                        | NA    | 13,2  | NA    | 15,9  | 16,6  | 12,3  | 12    | 15         | 17,2  | 16,7  | NA    |
|                                              | SD                                | NA    | 5,4   | NA    | 5,8   | 1,2   |       | 3,8   | 6          | 5,4   | 5,5   | NA    |
| Uncontrolled asthma (based on ACQ/ACT score) | n                                 | 88    | 331   | 581   | 221   | 130   | 191   | 27    | 135        | 250   | 87    | 21    |
|                                              | %                                 | 61,5  | 76,1  | 84,6  | 68,8  | 100   | 99    | 100   | 71,1       | 54,6  | 64    | 70,0  |
| Lab                                          |                                   |       |       |       |       |       |       |       |            |       |       |       |
| Leukocytes                                   | n                                 | 232   | NA    | NA    | NA    | 125   | 193   | 27    | 114        | 184   | 135   | NA    |
|                                              | x10 <sup>9</sup> cells/L (SD)     | 9,1   | NA    | NA    | NA    | 9,1   | 8,4   | 8,2   | 8,5        | 8,5   | 8,8   | NA    |
|                                              | SD                                | 2,8   | NA    | NA    | NA    | 2,8   | 2,7   | 2,9   | 2,8        | 4,6   | 3,3   | NA    |
| Eosinophils absolute                         | n                                 | 225   | 516   | 749   | 199   | 125   | 193   | 27    | 111        | 228   | 132   | 45    |
|                                              | x10 <sup>9</sup> cells/L (median) | 0,290 | 0,280 | 0,300 | 0,310 | 0,345 | 0,410 | 0,800 | 0,230      | 0,540 | 0,260 | 0,250 |
|                                              | Q1                                | 0,105 | 0,114 | 0,200 | 0,100 | 0,140 | 0,200 | 0,600 | 0,100      | 0,190 | 0,120 | 0,100 |
|                                              | Q3                                | 0,570 | 0,539 | 0,600 | 0,530 | 0,578 | 0,740 | 1,000 | 0,580      | 0,645 | 0,440 | 0,600 |
| Eosinophils relative                         | n                                 | 32    | 517   | NA    | NA    | 125   | 193   | 27    | NA         | 201   | 134   | NA    |
|                                              | % (SD)                            | 5,2   | 7,3   | NA    | NA    | 4,6   | 4,7   | 11,2  | NA         | 6,2   | 4,1   | NA    |
|                                              | SD                                | 9,1   | 55,9  | NA    | NA    | 3,9   | 4,6   | 5,7   | NA         | 5,6   | 3,5   | NA    |
| Neutrophils absolute                         | n                                 | 222   | NA    | NA    | NA    | 125   | NA    | 27    | 100        | 183   | 134   | NA    |
|                                              | x10 <sup>9</sup> cells/L (median) | 5,48  | NA    | NA    | NA    | 5,26  | NA    | 3,80  | 5,02       | 4,75  | 5,16  | NA    |
|                                              | Q1                                | 4,09  | NA    | NA    | NA    | 3,98  | NA    | 2,90  | 3,71       | 3,12  | 3,60  | NA    |
|                                              | Q3                                | 7,25  | NA    | NA    | NA    | 7,37  | NA    | 5,10  | 7,15       | 5,66  | 6,80  | NA    |
| Neutrophils relative                         | n                                 | 27    | NA    | NA    | NA    | 125   | NA    | 27    | 100        | 134   | 132   | NA    |
|                                              | % (SD)                            | 65,2  | NA    | NA    | NA    | 65,2  | NA    | 52,2  | 62,7       | 52,4  | 62,7  | NA    |
|                                              | SD                                | 12,7  | NA    | NA    | NA    | 12,1  | NA    | 8,8   | 14,5       | 16,9  | 1,6   | NA    |
| Total IgE (serum)                            | n                                 | 222   | 533   | 739   | 199   | 65    | 193   | 20    | 66         | 260   | 139   | 36    |
|                                              | IU/ml, median (IQR)               | 144   | 190   | 165   | 236   | 164   | 168   | 275   | 197        | 272   | 238   | 164   |
|                                              | Q1                                | 49    | 68    | 55    | 102   | 54,7  | 78    | 115   | 78         | 122   | 115   | 74    |
|                                              | Q3                                | 368   | 513   | 491   | 516   | 385   | 435   | 820   | 579        | 561   | 358   | 283   |
| Positive for Aspergillus                     | n (%)                             | 29    | NA    | NA    | 2     | 0     | 0     | 1     | 28 (molds) | 24    | NA    | NA    |
|                                              | %                                 | 12,4  | NA    | NA    | 0,5   | 0     | 0     | 3,7   | 13,9       | 5,5   | NA    | NA    |
| Negative for Aspergillus                     | n (%)                             | 103   | NA    | NA    | NA    | 40    | 10    | 26    | 28         | NA    | NA    | NA    |
|                                              | %                                 | 44    | NA    | NA    | NA    | 30,7  | 5,2   | 96,3  | 13,9       | NA    | NA    | NA    |

|                                   |                   |      |      |      |      |      |      |      |      |         |      |    |
|-----------------------------------|-------------------|------|------|------|------|------|------|------|------|---------|------|----|
| No Aspergillus result available   | n (%)             | 102  | NA   | NA   | NA   | 90   | 183  | 0    | 174  | NA      | NA   | NA |
|                                   | %                 | 43,6 | NA   | NA   | NA   | 69,2 | 94,8 | 0    | 86,1 | NA      | NA   | NA |
| FeNO                              | n                 | 213  | 450  | 540  | 85   | 69   | 8    | 26   | 7    | 132     | 122  | 50 |
|                                   | ppm, median (IQR) | 33   | 25   | 41   | 33   | 32   | 27   | 57   | 33   | 32      | 66   | 26 |
|                                   | Q1                | 20   | 14   | 23   | 19   | 18   | 20   | 29   | 19   | 17      | 27   | 13 |
|                                   | Q3                | 60   | 42   | 77   | 52   | 56   | 47   | 80   | 79   | 64      | 101  | 49 |
| Comorbidities                     |                   |      |      |      |      |      |      |      |      |         |      |    |
| Comorbidity data available        | n                 | 236  | 622  | 765  | 121  | 130  | 193  | 27   | 201  | 162-298 | 139  | NA |
| Aspirin intolerance               | n (%)             | 38   | 49   | NA   | 72   | 52   | 44   | 7    | 43   | 57      | 33   | NA |
|                                   | %                 | 16,1 | 8,2  | NA   | 17,6 | 40   | 22,8 | 26,9 | 21,4 | 19,1    | 23,7 | NA |
| Churg-Strauß syndrome (EGPA)      | n (%)             | 6    | 18   | NA   | 3    | 9    | 2    | 0    | 3    | NA      | 4    | NA |
|                                   | %                 | 2,5  | 3,1  | NA   | 2,5  | 6,9  | 1    | 0    | 1,5  | NA      | 2,8  | NA |
| ABPA                              | n (%)             | 3    | 24   | NA   | 1    | 0    | 0    | 0    | 1    | NA      | 3    | NA |
|                                   | %                 | 1,3  | 3,9  | NA   | 0,8  | 0    | 0    | 0    | 0,5  | NA      | 2,1  | NA |
| Nasal Polyps                      | n (%)             | 107  | 151  | 102  | 295  | 58   | 24   | 9    | NA   | 69      | 9    | NA |
|                                   | %                 | 45,3 | 24,3 | 13,3 | 72   | 44,6 | 12,4 | 33   | NA   | 42,6    | 6,4  | NA |
| Bronchiectasis                    | n (%)             | 36   | 104  | 35   | 10   | 2    | 4    | 0    | 10   | 44      | 8    | NA |
|                                   | %                 | 15,3 | 16,7 | 4,6  | 2,4  | 1,5  | 2,1  | 0    | 5    | 16,5    | 5,7  | NA |
| Therapy                           |                   |      |      |      |      |      |      |      |      |         |      |    |
| Therapy data available            | n                 | 237  | 629  | 765  | 379  | 130  | 193  | 27   | 202  | 437     | 139  | NA |
| Included in primary care center   | n                 | 0    | 0    | 0    | 16   | 0    | 0    | 0    | NA   | 0       | 0    | NA |
|                                   | %                 | 0    | 0    | 0    | 3,9  | 0    | 0    | 0    | NA   | 0       | 0    | NA |
| Included in secondary care center | n                 | 76   | 52   | 0    | 125  | 44   | 0    | 0    | NA   | 0       | 0    | NA |
|                                   | %                 | 32,1 | 8,3  | 0    | 30,5 | 33,8 | 0    | 0    | NA   | 0       | 0    | NA |
| Included in tertiary care center  | n                 | 161  | 577  | 765  | 269  | 86   | 193  | 27   | NA   | 437     | 139  | NA |
|                                   | %                 | 67,9 | 91,7 | 100  | 65,6 | 66,2 | 100  | 100  | NA   | 100     | 100  | NA |
| Medication use data available     | n                 | 237  | 629  | 743  | 379  | 130  | 193  | 27   | 209  | 315     | 139  | NA |
| GINA step 4 treatment             | n                 | 113  | 308  | 162  | 197  | 93   | 53   | 15   | 130  | 18      | 87   | NA |
|                                   | %                 | 47,7 | 49   | 21,2 | 48,1 | 71,5 | 27,5 | 55,6 | 62,2 | 5,7     | 62,6 | NA |
| GINA step 5 treatment             | n                 | 118  | 261  | 569  | 210  | 37   | 140  | 12   | 79   | 297     | 52   | NA |
|                                   | %                 | 49,8 | 41,5 | 74,4 | 51,2 | 28,5 | 72,5 | 44,4 | 37,8 | 94,3    | 37,4 | NA |
| Data on adherence is available    | n                 | 6    | 629  | 603  | 394  | 14   | 193  | 27   | NA   | NA      | NA   | NA |
| Adherence to therapy is checked   | n                 | 6    | 629  | 519  | 332  | 14   | 193  | 27   | NA   | NA      | NA   | NA |
|                                   | %                 | 2,5  | 100  | 86,1 | 84,3 | 10,8 | 100  | 100  | NA   | NA      | NA   | NA |
| On biological treatment           | n                 | 82   | 185  | 479  | 210  | 30   | 137  | 0    | 80   | 215     | 66   | NA |
|                                   | %                 | 34,6 | 29,4 | 64,5 | 51,2 | 23,1 | 71   | 0    | 38,3 | 49,5    | 47,4 | NA |
| Anti-IgE                          | n                 | 29   | 157  | 115  | 197  | 16   | 129  | 0    | 41   | 180     | 59   | NA |
|                                   | %                 | 12,2 | 25   | 25,4 | 48,1 | 12,3 | 66,8 | 0    | 19,6 | 41,2    | 42,4 | NA |
| Anti-IL5                          | n                 | 53   | 28   | 337  | 13   | 14   | 8    | 0    | 39   | 35      | 7    | NA |
|                                   | %                 | 22,4 | 4,5  | 74,4 | 3,2  | 10,8 | 4,1  | 0    | 18,7 | 8,1     | 5    | NA |
| Anti-IL4/IL13                     | n                 | 0    | 0    | 1    | 0    | 0    | 0    | 0    | NA   | NA      | 0    | NA |
|                                   | %                 | 0    | 0    | 0,2  | 0    | 0    | 0    | 0    | NA   | NA      | 0    | NA |

|                                  |                 |      |      |      |      |      |      |      |      |      |      |    |
|----------------------------------|-----------------|------|------|------|------|------|------|------|------|------|------|----|
| Received thermoplasty            | n               | 3    | 9    | 0    | 0    | 0    | 0    | 0    | NA   | NA   | 2    | NA |
|                                  | %               | 1,3  | 1,4  | 0    | 0    | 0    | 0    | 0    | NA   | NA   | 1,4  | NA |
| Received high altitude treatment | n               | 33   | 0    | NA   | 0    | 0    | 0    | 0    | NA   | NA   | 0    | NA |
|                                  | %               | 14   | 0    | NA   | 0    | 0    | 0    | 0    | NA   | NA   | 0    | NA |
| ICS mean fluticasone equivalent  | n               | 234  | 627  | 654  | 251  | 130  | 193  | 27   | 198  | 299  | 138  | NA |
|                                  | µg/day (SD)     | 1027 | 954  | 934  | 1225 | 920  | 1220 | 1196 | 676  | 542  | 491  | NA |
|                                  | SD              | 737  | 501  | 449  | 445  | 370  | 668  | 641  | 398  | 489  | 163  | NA |
| OCS maintenance, mean            | n               | 119  | 137  | 415  | 146  | 37   | 87   | 17   | 79   | 199  | 52   | NA |
|                                  | mg/day (median) | 10,0 | 9,0  | 10,0 | 10,0 | 7,5  | 7,0  | 10,0 | 10,0 | 10,7 | 10,0 | NA |
|                                  | Q1              | 5,0  | 5,0  | 10,0 | 5,0  | 5,0  | 7,0  | 7,5  | 5,0  | 5,0  | 5,0  | NA |
|                                  | Q3              | 17,5 | 10,0 | 20,0 | 10,0 | 10,0 | 15,0 | 10,0 | 15,0 | 20,0 | 10,0 | NA |

SD: standard deviation, IQR: Interquartile range from quartile 1 – quartile 3, BMI: body mass index, FEV1: Forced expiratory volume in one second, FVC: Forced vital capacity, BD: Broncho-dilator, PC20: provocative concentration causing a 20% drop in FEV1, KCO: Carbon monoxide diffusion, FeNO: fraction of exhaled Nitric Oxide, ACQ: asthma control questionnaire, ACT: asthma control test, GINA: Global Initiative for asthma, ICS: inhalation corticosteroids, OCS: oral corticosteroids. \*: dose expressed as fluticasone equivalents, †: dose expressed as prednisone equivalents.

**Supplementary table S2.** Baseline characteristics of patients not on high-cost therapies (prior to start or >6 months after stopping).

| Parameter                |                   | NL   | Belgium | United Kingdom | Spain | Hungary | Poland | Sweden | Germany | Italy | Slovenia | Denmark |
|--------------------------|-------------------|------|---------|----------------|-------|---------|--------|--------|---------|-------|----------|---------|
| <i>Demographic</i>       |                   |      |         |                |       |         |        |        |         |       |          |         |
| Age                      | n                 | 143  | 471     | 479            | 212   | 100     | 193    | 27     | NA      | 219   | 74       | 56      |
|                          | years             | 55,5 | 57      | 48,6           | 57,9  | 61      | 48,4   | 50     | NA      | 55,1  | 54,8     | 53,1    |
|                          | SD                | 13,1 | 14      | 14,1           | 13,7  | 12,7    | 14,6   | 8,6    | NA      | 13,8  | 12,2     | 15,6    |
| Male                     | n                 | 81   | 184     | 196            | 76    | 37      | 76     | 14     | NA      | 95    | 19       | 26      |
|                          | %                 | 56,6 | 39,1    | 40,9           | 35,8  | 37      | 39,4   | 51,9   | NA      | 42,8  | 25,6     | 46,4    |
| Smoking status available | n                 | 143  | 471     | 458            | 212   | 100     | 193    | 27     | NA      | 219   | 74       | 47      |
| Current smoker           | n                 | 0    | 49      | 6              | 8     | 7       | 0      | 0      | NA      | 5     | 1        | 2       |
|                          | %                 | 0    | 10,4    | 1,3            | 3,8   | 7       | 0      | 0      | NA      | 2,3   | 1,3      | 4,3     |
| Never smoker             | n                 | 81   | 273     | 343            | 153   | 80      | 171    | 16     | NA      | 186   | 47       | 22      |
|                          | %                 | 56,6 | 58      | 74,9           | 72,2  | 80      | 88,6   | 59,3   | NA      | 84,9  | 63,5     | 46,8    |
| Ex-smoker                | n                 | 62   | 149     | 109            | 50    | 13      | 22     | 11     | NA      | 31    | 26       | 18      |
|                          | %                 | 43,4 | 31,6    | 23,8           | 23,6  | 13      | 11,4   | 40,7   | NA      | 14,1  | 35,1     | 38,3    |
| Pack-years               | n                 | 62   | 199     | 97             | 12    | 20      | 22     | 11     | NA      | 36    | 27       | 15      |
|                          | years, median     | 10   | 15      | 15             | 20    | <5      | NA     | 5      | NA      | 8     | 10       | 10      |
|                          | Q1                | 4    | 6       | 8              | 5     | <5      | NA     | 4      | NA      | 7     | 2        | 4       |
|                          | Q3                | 20   | 30      | 20             | 25    | <5      | NA     | 9      | NA      | 15    | 22       | 15      |
| <i>Clinical</i>          |                   |      |         |                |       |         |        |        |         |       |          |         |
| BMI                      | n                 | 143  | 471     | 466            | 212   | 100     | 193    | 27     | NA      | 95    | 74       | 55      |
|                          | kg/m <sup>2</sup> | 28,3 | 27,8    | 30,6           | 27,8  | 27      | 28,2   | 27,7   | NA      | 26,5  | 27,4     | 27,3    |
|                          | SD                | 5,2  | 14,5    | 6,6            | 5,6   | 5,3     | 4,48   | 5,3    | NA      | 5,3   | 6,3      | 5,4     |
| Pre-BD FEV <sub>1</sub>  | n                 | 142  | 456     | 421            | 26    | 100     | 193    | 27     | NA      | 98    | 74       | 48      |

|                                              |                                   |         |       |       |       |       |       |       |    |        |       |       |
|----------------------------------------------|-----------------------------------|---------|-------|-------|-------|-------|-------|-------|----|--------|-------|-------|
|                                              | %pred                             | 75,7    | 67,8  | 65,2  | 63,9  | 56    | 63,2  | 66    | NA | 74,2   | 64,9  | 71,8  |
|                                              | SD                                | 23,4    | 22,3  | 21,8  | 21,4  | 16,8  | 23,5  | 19,9  | NA | 20,6   | 18,9  | 19,3  |
| Pre-BD FVC                                   | n                                 | 142     | 456   | 408   | NA    | 100   | NA    | 27    | NA | 96     | 71    | 47    |
|                                              | %pred                             | 96,5    | 87,9  | 85,1  | NA    | 76,2  | NA    | 86,8  | NA | 90,6   | 93,2  | 78,1  |
|                                              | SD                                | 21,2    | 20,8  | 19,7  | NA    | 19    | NA    | 19,6  | NA | 20,7   | 15,4  | 18,5  |
| Post-BD FEV <sub>1</sub>                     | n                                 | 107     | 471   | 221   | NA    | 100   | NA    | 27    | NA | 60     | NA    | NA    |
|                                              | %pred                             | 80,3    | 73,5  | 71,5  | NA    | 61,5  | NA    | 73,2  | NA | 73,4   | NA    | NA    |
|                                              | SD                                | 23,1    | 29,4  | 22,7  | NA    | 17,5  | NA    | 19    | NA | 24,8   | NA    | NA    |
| Post-BD FVC                                  | n                                 | 107     | NA    | 209   | NA    | 100   | NA    | 27    | NA | NA     | NA    | NA    |
|                                              | %pred                             | 101,8   | NA    | 90,8  | NA    | 81,3  | NA    | 91,7  | NA | NA     | NA    | NA    |
|                                              | SD                                | 17,4    | NA    | 20,4  | NA    | 19    | NA    | 14,5  | NA | NA     | NA    | NA    |
| PC20                                         | n                                 | NA      | 48    | 2     | NA    | NA    | NA    | NA    | NA | NA     | NA    | NA    |
|                                              | mg/ml, median                     | NA      | 1,1   | 13,3  | NA    | NA    | NA    | NA    | NA | NA     | NA    | NA    |
|                                              | Q1                                | NA      | 0,3   | 3,6   | NA    | NA    | NA    | NA    | NA | NA     | NA    | NA    |
|                                              | Q3                                | NA      | 8     | 23    | NA    | NA    | NA    | NA    | NA | NA     | NA    | NA    |
| KCO                                          | n                                 | 74      | 374   | 312   | NA    | 12    | NA    | 27    | NA | NA     | 22    | NA    |
|                                              | %pred (SD)                        | 97,5    | 97,5  | 98,8  | NA    | 86,3  | NA    | 79,3  | NA | NA     | 84,4  | NA    |
|                                              | SD                                | 17,8    | 20,4  | 47,1  | NA    | 4,6   | NA    | 15,9  | NA | NA     | 14,8  | NA    |
| Medical history available                    | n                                 | 120-137 | 471   | 400   | 212   | 100   | 193   | 27    | NA | 97-158 | 74    | 32    |
| Adult onset                                  | n                                 | 85      | 155   | 246   | NA    | 72    | 68    | 24    | NA | 49     | 60    | 26    |
|                                              | %                                 | 70,8    | 32,9  | 61,5  | NA    | 72    | 35,2  | 88,9  | NA | 22,4   | 81,1  | 81,2  |
| Asthma hospitalization during past 12 months | n                                 | NA      | 170   | 180   | 193   | 27    | 78    | 1     | NA | 19     | 33    | NA    |
|                                              | %                                 | NA      | 36,1  | 38,9  | 91    | 27    | 40,5  | 3,7   | NA | 19     | 47,8  | NA    |
| Ever near fatal exacerbations                | n                                 | 21      | 50    | NA    | 0     | 8     | 52    | 2     | NA | 3      | 13    | 0     |
|                                              | %                                 | 14,7    | 10,6  | NA    | 0     | 8     | 26,9  | 7,4   | NA | 3      | 18,8  | 0     |
| ACQ                                          | n                                 | 90      | 330   | 436   | NA    | NA    | 193   | 17    | NA | 74     | NA    | 30    |
|                                              | mean score                        | 2,3     | 2,6   | 2,9   | NA    | NA    | 3,3   | 1,8   | NA | 2,6    | NA    | 2,4   |
|                                              | SD                                | 1,3     | 1,3   | 1,4   | NA    | NA    | 0,9   | 1     | NA | 1,4    | NA    | 1,4   |
|                                              |                                   |         |       |       |       |       |       |       |    |        |       |       |
| ACT                                          | n                                 | NA      | 345   | NA    | 150   | 100   | 28    | 10    | NA | 84     | 70    | NA    |
|                                              | mean score                        | NA      | 12,6  | NA    | 14,9  | 16,7  | 12,3  | 12    | NA | 16,4   | 15,8  | NA    |
|                                              | SD                                | NA      | 5,1   | NA    | 5,4   | 1,2   |       | 3,8   | NA | 5,5    | 5,1   | NA    |
| Uncontrolled asthma (based on ACQ/ACT score) | n                                 | 88      | 261   | 363   | 114   | 100   | 191   | 27    | NA | 96     | 53    | 21    |
|                                              | %                                 | 96,7    | 79,1  | 83,3  | 76    | 100   | 99    | 100   | NA | 60,8   | 75,3  | 70,0  |
| Lab                                          |                                   |         |       |       |       |       |       |       |    |        |       |       |
| Leukocytes                                   | n                                 | 142     | NA    | NA    | NA    | 97    | 193   | 27    | NA | 67     | 72    | NA    |
|                                              | x10 <sup>9</sup> cells/L (SD)     | 9       | NA    | NA    | NA    | 9,07  | 8,4   | 8,24  | NA | 8,46   | 9,2   | NA    |
|                                              | SD                                | 2,3     | NA    | NA    | NA    | 2,77  | 2,7   | 2,9   | NA | 3,62   | 3,62  | NA    |
| Eosinophils absolute                         | n                                 | 141     | 388   | 474   | 125   | 97    | 193   | 27    | NA | 75     | 72    | 45    |
|                                              | x10 <sup>9</sup> cells/L (median) | 0,360   | 0,260 | 0,400 | 0,600 | 0,325 | 0,410 | 0,800 | NA | 0,660  | 0,280 | 0,250 |
|                                              | Q1                                | 0,165   | 0,111 | 0,200 | 0,150 | 0,120 | 0,200 | 0,600 | NA | 0,200  | 0,140 | 0,100 |
|                                              | Q3                                | 0,610   | 0,500 | 0,600 | 0,600 | 0,548 | 0,740 | 1,000 | NA | 0,750  | 0,460 | 0,600 |
| Eosinophils relative                         | n                                 | 4       | 389   | NA    | NA    | 97    | 193   | 27    | NA | 74     | 72    | NA    |

|                                 |                                   |      |      |      |      |      |      |      |    |       |      |     |
|---------------------------------|-----------------------------------|------|------|------|------|------|------|------|----|-------|------|-----|
|                                 | % (SD)                            | 20,7 | 8,1  | NA   | NA   | 4,2  | 4,7  | 11,2 | NA | 6,9   | 4,2  | NA  |
|                                 | SD                                | 18,1 | 65,6 | NA   | NA   | 3,5  | 4,6  | 5,7  | NA | 5,9   | 3,3  | NA  |
| Neutrophils absolute            | n                                 | 141  | NA   | NA   | NA   | 97   | NA   | 27   | NA | 41    | 72   | NA  |
|                                 | x10 <sup>9</sup> cells/L (median) | 5,46 | NA   | NA   | NA   | 5,25 | NA   | 3,80 | NA | 4,80  | 5,60 | NA  |
|                                 | Q1                                | 4,16 | NA   | NA   | NA   | 3,90 | NA   | 2,90 | NA | 3,44  | 3,70 | NA  |
|                                 | Q3                                | 7,23 | NA   | NA   | NA   | 7,48 | NA   | 5,10 | NA | 5,08  | 7,50 | NA  |
| Neutrophils relative            | n                                 | NA   | NA   | NA   | NA   | 97   | NA   | 27   | NA | 33    | 72   | NA  |
|                                 | % (SD)                            | NA   | NA   | NA   | NA   | 65,1 | NA   | 52,2 | NA | 54,7  | 62,7 | NA  |
|                                 | SD                                | NA   | NA   | NA   | NA   | 12,3 | NA   | 8,8  | NA | 15,6  | 12,1 | NA  |
| Total IgE (serum)               | n                                 | 141  | 403  | 467  | 58   | 39   | 193  | 20   | NA | 71    | 52   | 36  |
|                                 | IU/ml, median (IQR)               | 144  | 147  | 172  | 250  | 181  | 168  | 275  | NA | 159   | 149  | 164 |
|                                 | Q1                                | 49   | 51   | 58   | 117  | 41   | 78   | 115  | NA | 83    | 204  | 74  |
|                                 | Q3                                | 379  | 453  | 467  | 520  | 445  | 435  | 820  | NA | 392   | 271  | 283 |
| Positive for Aspergillus        | n (%)                             | 16   | NA   | NA   | 0    | 0    | 0    | 1    | NA | 6     | NA   | NA  |
|                                 | %                                 | 11,2 | NA   | NA   | 0    | 0    | 0    | 3,7  | NA | 6     | NA   | NA  |
| Negative for Aspergillus        | n (%)                             | 64   | NA   | NA   | 212  | 28   | 10   | 26   | NA | NA    | NA   | NA  |
|                                 | %                                 | 44,8 | NA   | NA   | 100  | 28   | 5,2  | 96,3 | NA | NA    | NA   | NA  |
| No Aspergillus result available | n (%)                             | 63   | NA   | NA   | 0    | 72   | 183  | 0    | NA | NA    | NA   | NA  |
|                                 | %                                 | 44,1 | NA   | NA   | 0    | 72   | 94,8 | 0    | NA | NA    | NA   | NA  |
| FeNO                            | n                                 | 125  | 365  | 293  | 58   | 60   | 8    | 26   | NA | 58    | 66   | 48  |
|                                 | ppm, median (IQR)                 | 36   | 25   | 50   | 37   | 32   | 27   | 57   | NA | 34    | 63   | 27  |
|                                 | Q1                                | 24   | 14   | 28   | 21   | 18   | 20   | 29   | NA | 21    | 31   | 14  |
|                                 | Q3                                | 60   | 42   | 81   | 62   | 54   | 47   | 80   | NA | 67    | 101  | 52  |
| Comorbidities                   |                                   |      |      |      |      |      |      |      |    |       |      |     |
| Comorbidity data available      | n                                 | 143  | 445  | 479  | 43   | 100  | 193  | 27   | NA | 49-98 | 73   | NA  |
| Aspirin intolerance             | n (%)                             | 25   | 40   | NA   | 49   | 40   | 44   | 7    | NA | 16    | 19   | NA  |
|                                 | %                                 | 17,5 | 8,9  | NA   | 23,1 | 40   | 22,8 | 25,9 | NA | 16,7  | 26   | NA  |
| Churg-Strauß syndrome (EGPA)    | n (%)                             | 4    | 10   | NA   | 3    | 6    | 2    | 0    | NA | NA    | 4    | NA  |
|                                 | %                                 | 2,8  | 2,3  | NA   | 1,4  | 6    | 1    | 0    | NA | NA    | 5,4  | NA  |
| ABPA                            | n (%)                             | 1    | 18   | NA   | 1    | 0    | 0    | 0    | NA | NA    | 2    | NA  |
|                                 | %                                 | 0,7  | 4    | NA   | 0,5  | 0    | 0    | 0    | NA | NA    | 2,7  | NA  |
| Nasal Polyps                    | n (%)                             | 75   | 113  | 70   | 163  | 48   | 24   | 9    | NA | 26    | 4    | NA  |
|                                 | %                                 | 52,4 | 25,4 | 14,6 | 76,9 | 48   | 12,4 | 33   | NA | 53,1  | 10,8 | NA  |
| Bronchiectasis                  | n (%)                             | 21   | 83   | 27   | 10   | 2    | 4    | 0    | NA | 20    | 6    | NA  |
|                                 | %                                 | 14,7 | 18,7 | 5,6  | 4,7  | 2    | 2,1  | 0    | NA | 20,4  | 8,2  | NA  |

SD: standard deviation, IQR: Interquartile range from quartile 1 – quartile 3, BMI: body mass index, FEV1: Forced expiratory volume in one second, FVC: Forced vital capacity, BD: Broncho-dilator, PC20: provocative concentration causing a 20% drop in FEV1, KCO: Carbon monoxide diffusion, FeNO: fraction of exhaled Nitric Oxide, ACQ: asthma control questionnaire, ACT: asthma control test, GINA: Global Initiative for asthma.



**Supplementary table S3.** Medication use and biomarker data from patients that are starting with anti-IL5 therapy (mepolizumab, reslizumab, benralizumab).

| Medication use                                |                     | NL   | Belgium | United Kingdom | Spain | Hungary | Poland | Sweden | Germany | Italy | Slovenia | Denmark |
|-----------------------------------------------|---------------------|------|---------|----------------|-------|---------|--------|--------|---------|-------|----------|---------|
| Medication data available                     | n                   | 142  | 12      | 337            | 13    | 14      | 8      | 27     | NA      | NA    | 24       | 38      |
| <i>Treatment according to GINA guidelines</i> |                     |      |         |                |       |         |        |        |         |       |          |         |
| GINA step 4                                   | n                   | 50   | 7       | 90             | 10    | 9       | 0      | 15     | NA      | NA    | 7        | NA      |
|                                               | %                   | 36,5 | 58,3    | 26,8           | 76,9  | 64,3    | 0      | 55,6   | NA      | NA    | 29,2     | NA      |
| GINA step 5                                   | n                   | 85   | 3       | 246            | 3     | 5       | 4      | 12     | NA      | NA    | 17       | NA      |
|                                               | %                   | 62   | 25      | 73,2           | 23,1  | 35,7    | 50     | 44,4   | NA      | NA    | 70,8     | NA      |
| <i>Medication use</i>                         |                     |      |         |                |       |         |        |        |         |       |          |         |
| SABA                                          | n                   | 107  | 10      | 315            | 6     | 14      | 8      | 27     | NA      | NA    | 17       | 21      |
|                                               | %                   | 74,8 | 83,3    | 94             | 46,2  | 100     | 100    | 100    | NA      | NA    | 70,8     | 55,3    |
| SAMA                                          | n                   | 25   | NA      | NA             | 5     | 0       | 1      | 8      | NA      | NA    | 5        | 4       |
|                                               | %                   | 17,5 | NA      | NA             | 38,5  | 0       | 12,5   | 29,6   | NA      | NA    | 20,8     | 10,5    |
| LABA                                          | n                   | 135  | 9       | 302            | 13    | 14      | 2      | 27     | NA      | NA    | 24       | 33      |
|                                               | %                   | 94,4 | 75      | 90,7           | 100   | 100     | 25     | 100    | NA      | NA    | 100      | 86,8    |
| LAMA                                          | n                   | 42   | 6       | 190            | 3     | 0       | 1      | 8      | NA      | NA    | 19       | 17      |
|                                               | %                   | 29,4 | 50      | 57,1           | 23,1  | 0       | 12,5   | 30     | NA      | NA    | 79,1     | 44,7    |
| ICS                                           | n                   | 142  | 12      | 337            | 13    | 14      | 8      | 27     | NA      | NA    | 24       | 36      |
|                                               | %                   | 100  | 100     | 100            | 100   | 100     | 100    | 100    | NA      | NA    | 100      | 94,7    |
| Mean fluticasone equivalent                   | n                   | 142  | 12      | 283            | 4     | 14      | 8      | 27     | NA      | NA    | 24       | 33      |
|                                               | µg                  | 1178 | 935     | 998            | 888   | 893     | 1335   | 1196   | NA      | NA    | 700      | 1076    |
|                                               | SD                  | 797  | 618     | 597            | 121   | 189     | 529    | 641    | NA      | NA    | 118      | 345     |
| Leukotriene receptor antagonists              | n                   | 29   | 8       | 135            | 10    | 10      | 5      | 21     | NA      | NA    | 15       | 24      |
|                                               | %                   | 20,4 | 66,7    | 41,5           | 76,9  | 71,4    | 62,5   | 77,8   | NA      | NA    | 62,5     | 63,2    |
| Theophylline                                  | n                   | 6    | 0       | 84             | 0     | 6       | 3      | 2      | NA      | NA    | 0        | 5       |
|                                               | %                   | 4,2  | 0       | 25,2           | 0     | 42,9    | 37,5   | 7,4    | NA      | NA    | 0        | 13,2    |
| OCS                                           | n                   | 87   | 2       | 246            | 3     | 5       | 4      | 17     | NA      | NA    | 17       | 18      |
|                                               | %                   | 61,3 | 16,7    | 73,2           | 23,1  | 35,7    | 50     | 63     | NA      | NA    | 70,8     | 47,4    |
| Maintenance treatment, prednisone eq. Dose    | n                   | 87   | 2       | 246            | 4     | 5       | 4      | 17     | NA      | NA    | 17       | NA      |
|                                               | DDD <sup>†</sup>    | 1,4  | NA      | NA             | 1,54  | 0,95    | NA     | 0,94   | NA      | NA    | NA       | NA      |
|                                               | SD                  | 1,1  | NA      | NA             | 1,43  | 0,11    | NA     | 0,29   | NA      | NA    | NA       | NA      |
|                                               | Mg/day (median)     | 10,0 | 2,5     | 10,0           | 12,5  | 10,0    | 9,0    | 10,0   | NA      | NA    | 10,0     | NA      |
|                                               | Q1                  | 7,5  | 1,9     | 10,0           | 9,3   | 8,1     | 5,5    | 7,5    | NA      | NA    | 5,0      | NA      |
|                                               | Q3                  | 20,0 | 6,3     | 20,0           | 10,0  | 10,0    | 13,5   | 10,0   | NA      | NA    | 12,5     | NA      |
| NSAIDS                                        | n                   | 3    | 1       | NA             | NA    | 0       | 2      | 20     | NA      | NA    | NA       | NA      |
|                                               | %                   | 2,1  | 8,3     | NA             | NA    | 0       | 25     | 74,1   | NA      | NA    | NA       | NA      |
| <i>Biomarkers</i>                             |                     |      |         |                |       |         |        |        |         |       |          |         |
| IgE                                           | n                   | 140  | 6       | 331            | 10    | 10      | 8      | 20     | NA      | NA    | 15       | 28      |
|                                               | Iu/ml, median (IQR) | 140  | 165     | 129            | 431   | 56      | 405    | 275    | NA      | NA    | 149      | 164     |
|                                               | Q1                  | 48   | 154     | 44             | 168   | 29      | 360    | 115    | NA      | NA    | 53       | 58      |

|                             |                                   |       |       |       |       |       |       |       |    |    |       |       |
|-----------------------------|-----------------------------------|-------|-------|-------|-------|-------|-------|-------|----|----|-------|-------|
|                             | Q3                                | 366   | 217   | 404   | 594   | 200   | 791   | 820   | NA | NA | 256   | 342   |
| Blood eosinophils, absolute | n                                 | 141   | 9     | 336   | 12    | 14    | 8     | 27    | NA | NA | 23    | 37    |
|                             | x10 <sup>9</sup> cells/l (median) | 0,360 | 0,490 | 0,400 | 0,530 | 0,685 | 0,565 | 0,800 | NA | NA | 0,440 | 0,270 |
|                             | Q1                                | 0,165 | 0,320 | 0,300 | 0,330 | 0,233 | 0,405 | 0,600 | NA | NA | 0,280 | 0,100 |
|                             | Q3                                | 0,610 | 0,760 | 0,700 | 0,830 | 1,010 | 0,855 | 1,000 | NA | NA | 0,670 | 0,600 |
| FeNO                        | n                                 | 125   | 5     | 192   | 11    | 3     | 8     | 26    | NA | NA | 24    | 38    |
|                             | ppm, median (IQR)                 | 36    | 27    | 54    | 48    | 52    | 27    | 57    | NA | NA | 90    | 38    |
|                             | Q1                                | 24    | 26    | 31    | 40    | 34    | 20    | 29    | NA | NA | 55    | 30    |
|                             | Q3                                | 60    | 62    | 81    | 70    | 135   | 47    | 80    | NA | NA | 101   | 56    |

SD: standard deviation, IQR: Interquartile range from quartile 1 – quartile 3, GINA: Global Initiative for asthma, SABA: short-acting beta agonist, LAMA: short-acting muscarinic antagonists, LABA: long-acting beta agonists, LAMA: long-acting muscarinic antagonists, ICS: inhalation corticosteroids, LTRA: leukotriene receptor antagonists, OCS: oral corticosteroids, NSAIDs: non-steroidal anti-inflammatory drugs, FeNO: fraction of exhaled nitric oxide. \*: dose expressed as fluticasone equivalents, †: dose expressed as prednisone equivalents.

**Supplementary table S4.** Medication use and biomarker data from patients that are starting with anti-IgE therapy (omalizumab).

| Medication use                         |    | NL | Belgium | UK   | Spain | Hungary | Poland | Sweden | Germany | Italy | Slovenia | Denmark |
|----------------------------------------|----|----|---------|------|-------|---------|--------|--------|---------|-------|----------|---------|
| Medication data available              | n  | NA | 87      | 115  | 197   | 16      | 129    | NA     | NA      | NA    | 9        | 11      |
| Treatment according to GINA guidelines |    |    |         |      |       |         |        |        |         |       |          |         |
| GINA step 4                            | n  | NA | 23      | 50   | 156   | 10      | 69     | NA     | NA      | NA    | 8        | NA      |
|                                        | %  | NA | 26,4    | 43,9 | 79,2  | 62,5    | 53,5   | NA     | NA      | NA    | 88,9     | NA      |
| GINA step 5                            | n  | NA | 56      | 64   | 41    | 6       | 60     | NA     | NA      | NA    | 1        | NA      |
|                                        | %  | NA | 64,4    | 56,1 | 20,8  | 37,5    | 46,5   | NA     | NA      | NA    | 11,1     | NA      |
| Medication use                         |    |    |         |      |       |         |        |        |         |       |          |         |
| SABA                                   | n  | NA | 75      | 107  | 16    | 16      | 129    | NA     | NA      | NA    | 5        | 8       |
|                                        | %  | NA | 86,2    | 93,9 | 8,1   | 100     | 100    | NA     | NA      | NA    | 55,5     | 72,7    |
| SAMA                                   | n  | NA | NA      | NA   | 169   | 0       | 26     | NA     | NA      | NA    | 4        | 0       |
|                                        | %  | NA | NA      | NA   | 85,8  | 0       | 20,2   | NA     | NA      | NA    | 44,4     | 0       |
| LABA                                   | n  | NA | 88      | 109  | 161   | 16      | 110    | NA     | NA      | NA    | 9        | 10      |
|                                        | %  | NA | 100     | 96,5 | 81,7  | 100     | 85,3   | NA     | NA      | NA    | 100      | 90      |
| LAMA                                   | n  | NA | 18      | 63   | 32    | 2       | 26     | NA     | NA      | NA    | 9        | 5       |
|                                        | %  | NA | 20,7    | 55,3 | 16,2  | 12,5    | 20,2   | NA     | NA      | NA    | 100      | 45,5    |
| ICS                                    | n  | NA | 84      | 115  | 197   | 16      | 129    | NA     | NA      | NA    | 9        | 10      |
|                                        | %  | NA | 96,6    | 100  | 100   | 100     | 100    | NA     | NA      | NA    | 100      | 90,9    |
| Mean fluticasone equivalent            | n  | NA | 84      | 107  | 197   | 16      | 129    | NA     | NA      | NA    | 9        | 8       |
|                                        | µg | NA | 881     | 923  | 1344  | 1016    | 1239   | NA     | NA      | NA    | 772      | 1063    |
|                                        | SD | NA | 571     | 201  | 540   | 392     | 677    | NA     | NA      | NA    | 191      | 496     |
| Leukotriene receptor antagonists       | n  | NA | 54      | 46   | 113   | 12      | 86     | NA     | NA      | NA    | 4        | 4       |
|                                        | %  | NA | 62,1    | 43,8 | 57,4  | 75      | 66,7   | NA     | NA      | NA    | 44       | 36,4    |
| Theophylline                           | n  | NA | 9       | 31   | 22    | 4       | 34     | NA     | NA      | NA    | 0        | 0       |
|                                        | %  | NA | 10,3    | 27,2 | 11,2  | 25      | 26,4   | NA     | NA      | NA    | 0        | 0       |

|                                                   |                                   |    |       |       |       |       |       |    |    |    |       |       |
|---------------------------------------------------|-----------------------------------|----|-------|-------|-------|-------|-------|----|----|----|-------|-------|
| <b>OCS</b>                                        | n                                 | NA | 10    | 64    | 41    | 6     | 60    | NA | NA | NA | 1     | 1     |
|                                                   | %                                 | NA | 11,5  | 56,1  | 20,8  | 37,5  | 46,5  | NA | NA | NA | 11,1  | 9,1   |
| <b>Maintenance treatment, prednisone eq. Dose</b> | n                                 | NA | 4     | 64    | 44    | 6     | 60    | NA | NA | NA | 1     | NA    |
|                                                   | DDD <sup>†</sup>                  | NA | NA    | NA    | 1,86  | 0,88  | NA    | NA | NA | NA | NA    | NA    |
|                                                   | SD                                | NA | NA    | NA    | 0,81  | 0,7   | NA    | NA | NA | NA | NA    | NA    |
|                                                   | Mg/day (median)                   | NA | 9,0   | 13,0  | 10,7  | 5,0   | 7,0   | NA | NA | NA | 7,5   | NA    |
|                                                   | Q1                                | NA | 7,3   | 10,0  | 5,0   | 4,4   | 5,0   | NA | NA | NA | NA    | NA    |
|                                                   | Q3                                | NA | 10,0  | 20,0  | 15,0  | 16,3  | 15,0  | NA | NA | NA | NA    | NA    |
| <b>NSAIDS</b>                                     | n                                 | NA | 5     | NA    | NA    | 0     | 27    | NA | NA | NA | NA    | NA    |
|                                                   | %                                 | NA | 5,7   | NA    | NA    | 0     | 20,9  | NA | NA | NA | NA    | NA    |
| <b>Biomarkers</b>                                 |                                   |    |       |       |       |       |       |    |    |    |       |       |
| <b>IgE</b>                                        | n                                 | NA | 69    | 110   | 177   | 16    | 129   | NA | NA | NA | 5     | 8     |
|                                                   | Iu/ml, median (IQR)               | NA | 277   | 324   | 243   | 172   | 154   | NA | NA | NA | 118   | 148   |
|                                                   | Q1                                | NA | 132   | 139   | 114   | 118   | 74    | NA | NA | NA | 32    | 91,5  |
|                                                   | Q3                                | NA | 576   | 567   | 515   | 233   | 388   | NA | NA | NA | 795   | 228,3 |
| <b>Blood eosinophils, absolute</b>                | n                                 | NA | 31    | 113   | 113   | 14    | 129   | NA | NA | NA | 8     | 8     |
|                                                   | x10 <sup>9</sup> cells/l (median) | NA | 0,250 | 0,300 | 0,420 | 0,210 | 0,220 | NA | NA | NA | 0,235 | 0,13  |
|                                                   | Q1                                | NA | 0,166 | 0,100 | 0,200 | 0,150 | 0,100 | NA | NA | NA | 0,150 | 0,1   |
|                                                   | Q3                                | NA | 0,310 | 0,500 | 0,600 | 0,438 | 0,510 | NA | NA | NA | 0,370 | 0,3   |
| <b>FeNO</b>                                       | n                                 | NA | 52    | 77    | 47    | 6     | NA    | NA | NA | NA | 6     | 10    |
|                                                   | ppm, median (IQR)                 | NA | 31    | 39    | 36    | 34    | NA    | NA | NA | NA | 75    | 10    |
|                                                   | Q1                                | NA | 13    | 24    | 20    | 27    | NA    | NA | NA | NA | 40,5  | 11,8  |
|                                                   | Q3                                | NA | 49    | 82    | 57    | 80    | NA    | NA | NA | NA | 92,2  | 29,8  |

SD: standard deviation, IQR: Interquartile range from quartile 1 – quartile 3, GINA: Global Initiative for asthma, SABA: short-acting beta agonist, LAMA: short-acting muscarinic antagonists, LABA: long-acting beta agonists, LAMA: long-acting muscarinic antagonists, ICS: inhalation corticosteroids, LTRA: leukotriene receptor antagonists, OCS: oral corticosteroids, NSAIDS: non-steroidal anti-inflammatory drugs, FeNO: fraction of exhaled nitric oxide. \*: dose expressed as fluticasone equivalents, †: dose expressed as prednisone equivalents.
