# Supplementary material
Source: HighWire-hosted journal article supplement (https://erj.ersjournals.com/content/55/1/1901163)
Supplement: inline-supplementary-material-2 [file inline-supplementary-material-2.pdf]

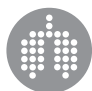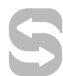

SHAREABLE PDF

# Characteristics and treatment regimens across ERS SHARP severe asthma registries

Job J.M.H. van Bragt<sup>1</sup>, Ian M. Adcock<sup>2</sup>, Elisabeth H.D. Bel<sup>1</sup>, Gert-Jan Braunstahl<sup>3</sup>, Anneke ten Brinke<sup>4</sup>, John Busby<sup>5</sup>, Giorgio W. Canonica<sup>6</sup>, Hui Cao<sup>7</sup>, Kian Fan Chung<sup>8</sup>, Zsuzsanna Csoma<sup>9</sup>, Barbro Dahlén<sup>10</sup>, Elizabeth Davin<sup>11</sup>, Susanne Hansen<sup>12</sup>, Enrico Heffler<sup>6</sup>, Ildiko Horvath<sup>9</sup>, Stephanie Korn<sup>13</sup>, Maxim Kots<sup>14</sup>, Piotr Kuna<sup>15</sup>, Namhee Kwon<sup>16</sup>, Renaud Louis<sup>17</sup>, Vicente Plaza<sup>18</sup>, Celeste Porsbjerg<sup>19</sup>, David Ramos-Barbon<sup>18</sup>, Levi B. Richards<sup>1</sup>, Sabina Škrjat<sup>20</sup>, Jacob K. Sont<sup>21</sup>, Susanne J.H. Vijverberg<sup>1</sup>, Els J.M. Weersink<sup>1</sup>, Valentyna Yasinska<sup>10</sup>, Scott S. Wagers<sup>22</sup>, Ratko Djukanovic<sup>23</sup> and Anke H. Maitland-van der Zee<sup>1</sup> on behalf of the SHARP Clinical Research Collaboration<sup>24</sup>

**Affiliations:** <sup>1</sup>Dept of Respiratory Medicine, Amsterdam UMC, University of Amsterdam, Amsterdam, The Netherlands. <sup>2</sup>Molecular Cell Biology Group, National Heart and Lung Institute, Imperial College London, London, UK. <sup>3</sup>Franciscus Gasthuis and Vlietland, Rotterdam, The Netherlands. <sup>4</sup>Medical Centre Leeuwarden, Leeuwarden, The Netherlands. <sup>5</sup>Centre for Public Health, School of Medicine, Dentistry and Biomedical Sciences, Queen's University Belfast, Belfast, UK. <sup>6</sup>Personalised Medicine Clinic, Asthma and Allergy, Humanitas Clinical and Research Centre, Humanitas University, Rozzano and SANI-Severe Asthma Network Italy, Milan, Italy. <sup>7</sup>Novartis Pharmaceuticals, East Hanover, NJ, USA. <sup>8</sup>Experimental Studies Medicine, National Heart and Lung Institute, Imperial College London, London, UK. <sup>9</sup>National Koranyi Institute of Pulmonology, Budapest, Hungary. <sup>10</sup>Division of Respiratory Medicine and Allergy, Dept of Medicine, Karolinska University Hospital, Huddinge, Sweden. <sup>11</sup>European Lung Foundation, Sheffield, UK. <sup>12</sup>Center for Clinical Research and Disease Prevention, Bispebjerg and Frederiksberg Hospital, Copenhagen, Denmark. <sup>13</sup>Universitätsmedizin Mainz, Mainz, Germany. <sup>14</sup>Global Clinical Development, Chiesi Farmaceutici, Parma, Italy. <sup>15</sup>Dept of Internal Medicine, Asthma and Allergy, Medical University of Lodz, Lodz, Poland. <sup>16</sup>Respiratory Medical Franchise, GSK, Brentford, UK. <sup>17</sup>Dept of Pulmonary Medicine, Centre Hospitalier Universitaire, GIGA-I3 Research Group, Liege University, Liege, Belgium. <sup>18</sup>Respiratory Medicine Dept and Biomedical Research Institute, Hospital de la Santa Creu i Sant Pau, Universitat Autònoma de Barcelona, Barcelona, Spain. <sup>19</sup>Respiratory Research Unit, Dept of Respiratory Medicine, Bispebjerg University Hospital, Copenhagen, Denmark. <sup>20</sup>University Clinic of Respiratory and Allergic Diseases, Golnik, Slovenia. <sup>21</sup>Dept of Biomedical Data Sciences, Section Medical Decision Making, Leiden University Medical Center, Leiden, The Netherlands. <sup>22</sup>BioSciConsulting, Maasmechelen, Belgium. <sup>23</sup>NIHR Southampton Respiratory Biomedical Research Unit, Faculty of Medicine, University of Southampton, Southampton, UK. <sup>24</sup>Members of the SHARP Clinical Research Collaboration are listed in the Acknowledgements section.

**Correspondence:** Job J.M.H. van Bragt, Dept of Respiratory Medicine, Amsterdam UMC, F5-260, Meibergdreef 9, 1105 AZ Amsterdam, The Netherlands. E-mail: j.j.vanbragt@amsterdamumc.nl

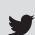

@ERSpublications

**The severe asthma population in Europe is heterogeneous and differs in clinical characteristics and treatment. Harmonisation across registries and guidelines is needed and requires collection of same data across cohorts to enable future research in SHARP.** <http://bit.ly/2krxHPf>

**Cite this article as:** van Bragt JJMH, Adcock IM, Bel EHD, *et al.* Characteristics and treatment regimens across ERS SHARP severe asthma registries. *Eur Respir J* 2020; 55: 1901163 [<https://doi.org/10.1183/13993003.01163-2019>].

This single-page version can be shared freely online.

**ABSTRACT** Little is known about the characteristics and treatments of patients with severe asthma across Europe, but both are likely to vary. This is the first study in the European Respiratory Society Severe Heterogeneous Asthma Research collaboration, Patient-centred (SHARP) Clinical Research Collaboration and it is designed to explore these variations. Therefore, we aimed to compare characteristics of patients in European severe asthma registries and treatments before starting biologicals.

This was a cross-sectional retrospective analysis of aggregated data from 11 national severe asthma registries that joined SHARP with established patient databases.

Analysis of data from 3236 patients showed many differences in characteristics and lifestyle factors. Current smokers ranged from 0% (Poland and Sweden) to 9.5% (Belgium), mean body mass index ranged from 26.2 (Italy) to 30.6 kg·m<sup>-2</sup> (the UK) and the largest difference in mean pre-bronchodilator forced expiratory volume in 1 s % predicted was 20.9% (the Netherlands *versus* Hungary). Before starting biologicals patients were treated differently between countries: mean inhaled corticosteroid dose ranged from 700 to 1335 µg·day<sup>-1</sup> between those from Slovenia *versus* Poland when starting anti-interleukin (IL)-5 antibody and from 772 to 1344 µg·day<sup>-1</sup> in those starting anti-IgE (Slovenia *versus* Spain). Maintenance oral corticosteroid use ranged from 21.0% (Belgium) to 63.0% (Sweden) and from 9.1% (Denmark) to 56.1% (the UK) in patients starting anti-IL-5 and anti-IgE, respectively.

The severe asthmatic population in Europe is heterogeneous and differs in both clinical characteristics and treatment, often appearing not to comply with the current European Respiratory Society/American Thoracic Society guidelines definition of severe asthma. Treatment regimens before starting biologicals were different from inclusion criteria in clinical trials and varied between countries.
